# Supplementary material for: Peroxidase-like activity of water-soluble cupric oxide nanoparticles and its analytical application for detection of hydrogen peroxide and glucose
Source: Royal Society of Chemistry journal article supplement (doi:10.1039/c2an35072f), 2012-01-01
Supplement: c2an35072f.pdf [file c2an35072f.pdf]

### Supporting information

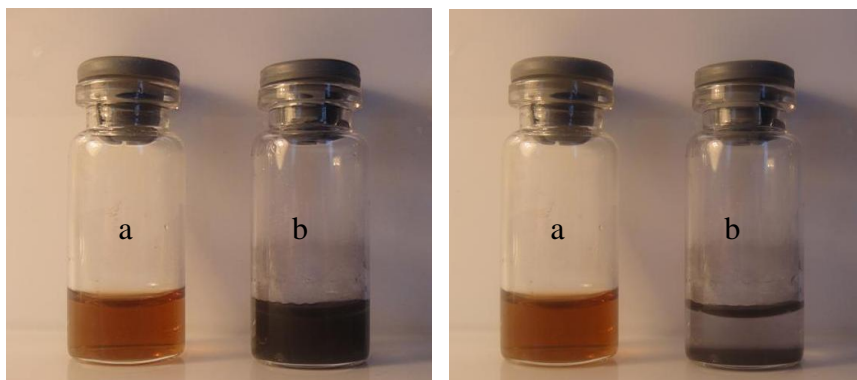

Figure S1. The photographs of (a) water-soluble CuO nanoparticles and (b) commercial CuO nanoparticles dispersed in distilled water (left) before and (right) after stored for six months.

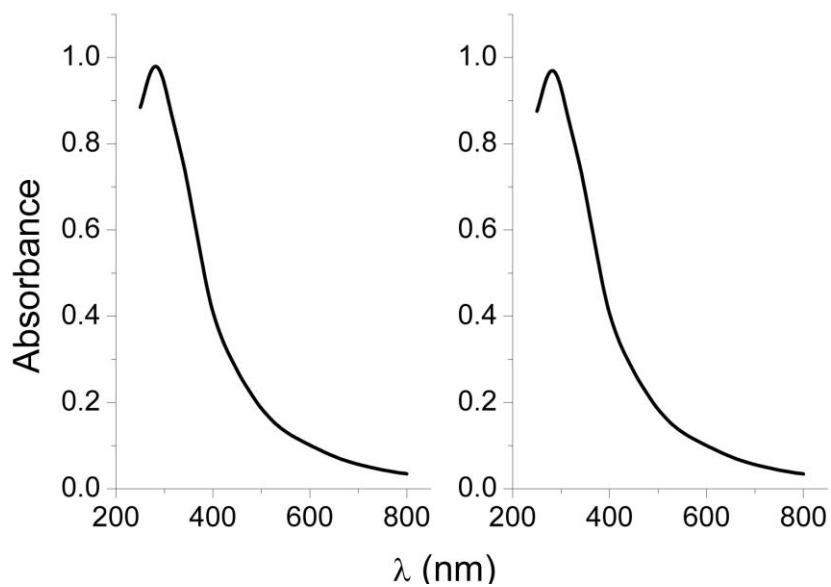

Figure S2. The UV-vis absorption spectrum of the colloid solution of CuO nanoparticles (left) before and (right) after stored for six months.
